# Supplementary material for: Increased random exploration in schizophrenia is associated with inflammation
Source: PubMed Central journal article supplement (PMC7859392; doi:10.1038/s41537-020-00133-0), 2021-02-03
Supplement: 41537_2020_133_MOESM1_ESM.pdf [file 41537_2020_133_MOESM1_ESM.pdf]

## Supplementary Information

### Figure and Table Legends

**Supplementary Figure 1.** Overview of the bandit task sequence. The three blue squares in every screenshot indicate the individual bandits. After selecting the bandit with the keypad, the points won are displayed in the center of the bandit. RT = Reaction time, ITI: Inter trial interval.

**Supplementary Figure 2.** Defining directed and random exploration based on the value of the selected bandit (i.e. random exploration equals switching from the best to the worst and directed exploration switching from the best to the second best option) revealed **A)** increased random ( $t = -2.31, p = 0.019$ ), but not **B)** directed exploration ( $t = -1.52, p = 0.133$ ) of patients with schizophrenia (SZ) compared to healthy control (HC) participants. \*  $p < 0.05$ . n.s. = non significant.

**Supplementary Figure 3.** Centrality analysis shows that high sensitivity C-reactive protein (hsCRP) has the highest strength of all immune-parameters included. For a list of abbreviations see **Table S2**.

**Supplementary Figure 4.** Bootstrap based significance testing of non-zero estimated edge-weights of the network shown in **Fig. 2B**. Non-significant differences between edge weights are indicated by gray boxes, significant differences by black boxes. Significance is based on  $\alpha = 0.05$ . The colour of the diagonal boxes (ranging from red to blue) corresponds to the weights of the edges, with red indicating negative and blue positive weights. For a list of abbreviations see **Supplementary Table 2**.

**Supplementary Figure 5.** Bootstrap based significance testing of node strength for the nodes of the network shown in **Fig. 2B**. Non-significant differences between strength of

two nodes are indicated by gray boxes, significant differences by black boxes. Node strength of each node is presented by the number in the white boxes. For a list of abbreviations see **Supplementary Table 2**.

**Supplementary Figure 6.** The average correlation between bootstrap centrality measures of the network estimated with all cases and networks in which some cases were dropped. For a list of abbreviations see **Supplementary Table 2**.

**Supplementary Figure 7.** Bootstrapped 95% confidence intervals for estimated edge weights of the network shown in **Fig. 2B**. For a list of abbreviations see **Supplementary Table 2**.

**Supplementary Table 1.** Exploitation and random exploration correlate with the Positive and Negative Syndrome Scale (PANSS) disorganized factor but not with PANSS negative, positive or depressive factor or cognitive score. There are no associations between task parameters and chlorpromazine equivalents.

**Supplementary Table 2.** Abbreviations of immune parameters.

**Supplementary Table 3.** Group differences of measured peripheral immune parameters. Units: hsCRP: mg/l; immune parameters: normalized protein expression (NPX). For a list of abbreviations see **Supplementary Table 2**. Statistics: <sup>1</sup>Student's t-test. <sup>2</sup>Mann-Whitney U test.

**Supplementary Table 4.** Significant correlation between random exploration with high sensitivity C-reactive protein (hsCRP), but not with TRAIL or CCL20.

Supplementary Figures

Supplementary Figure 1

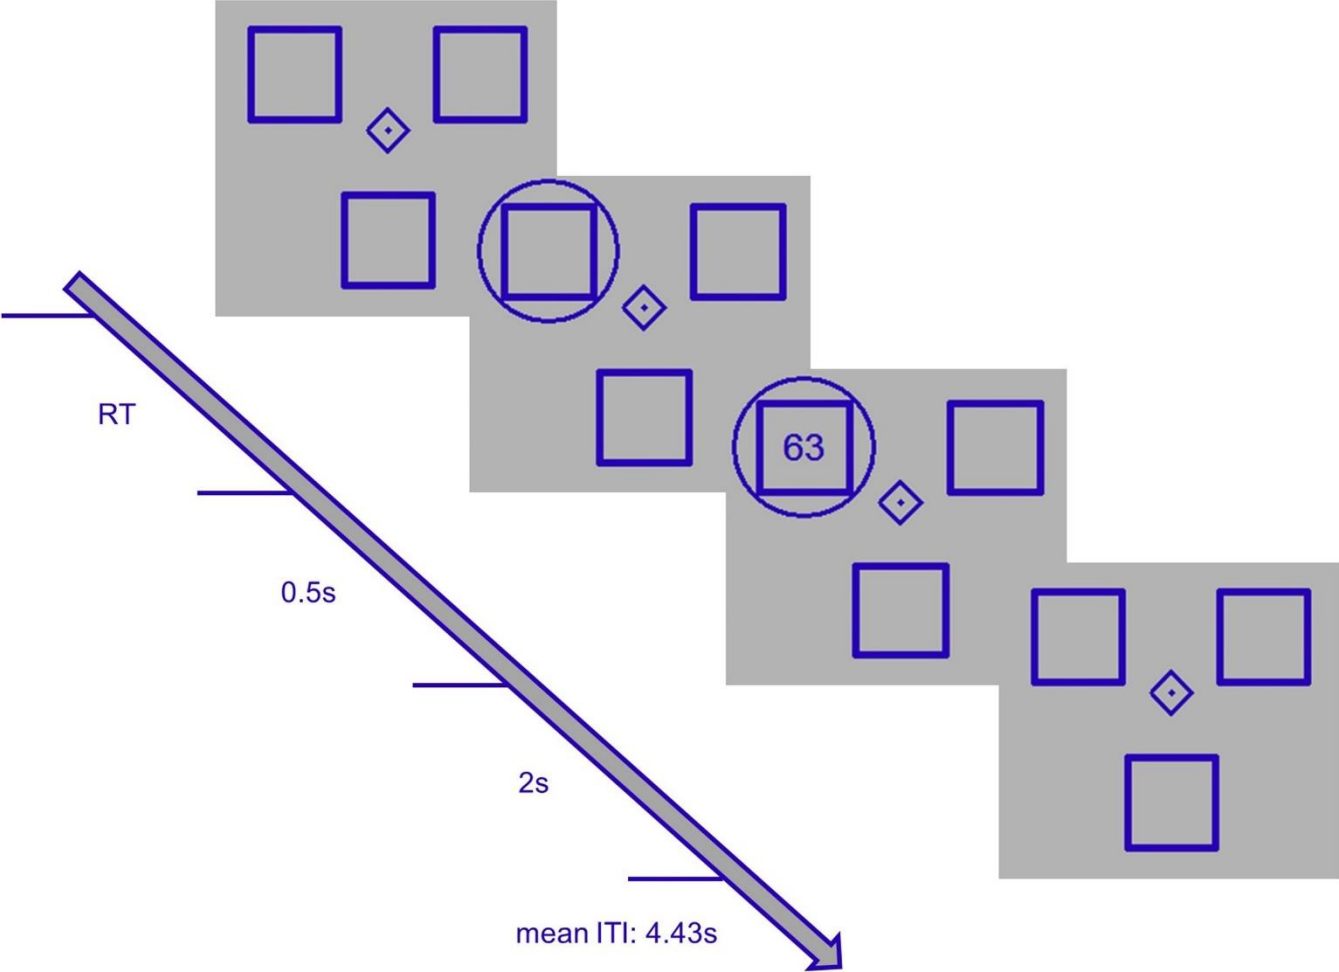

Supplementary Figure 2

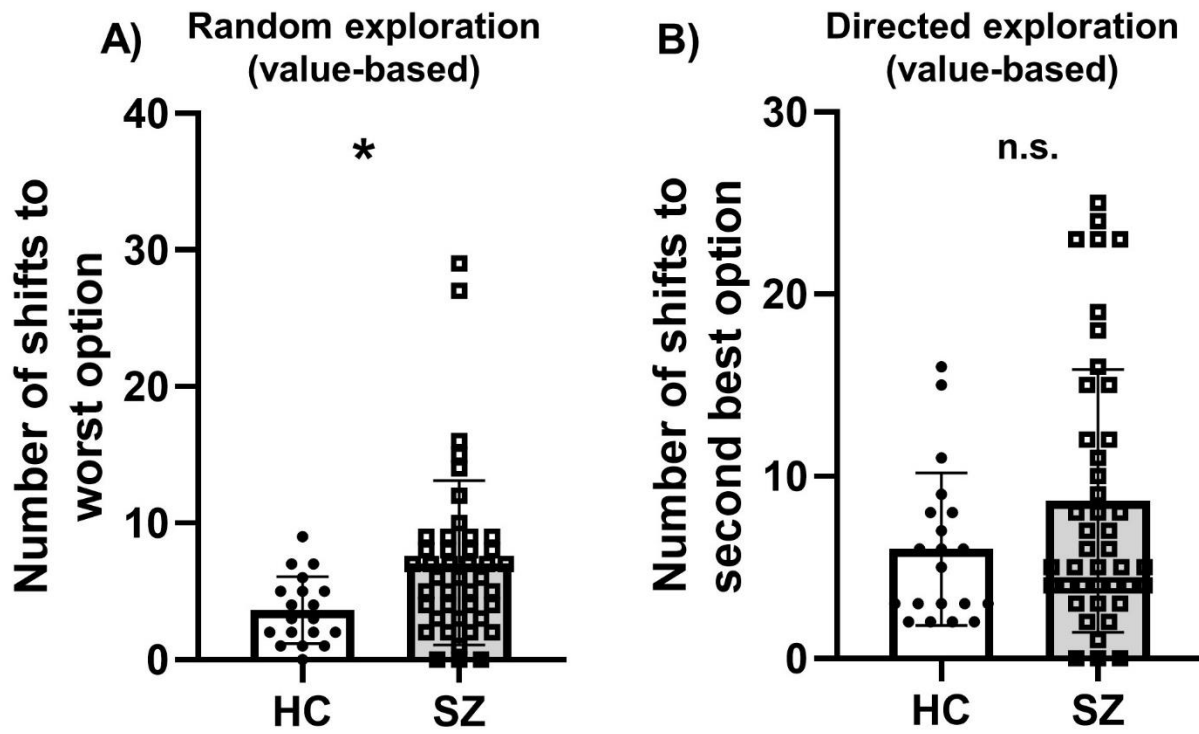

Supplementary Figure 3

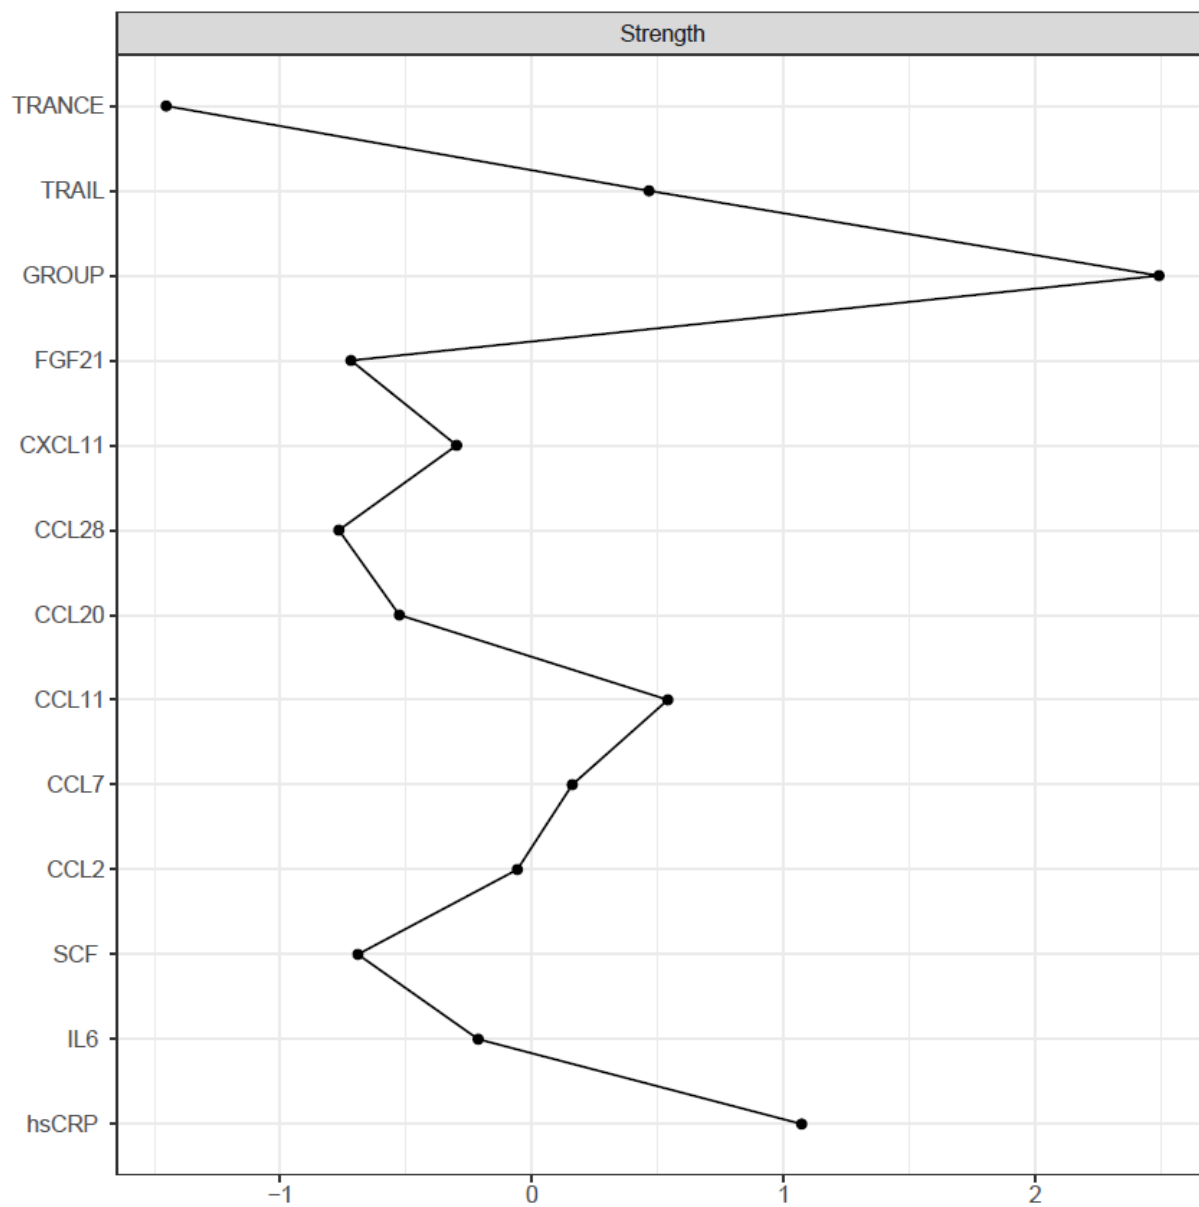

## Supplementary Figure 4

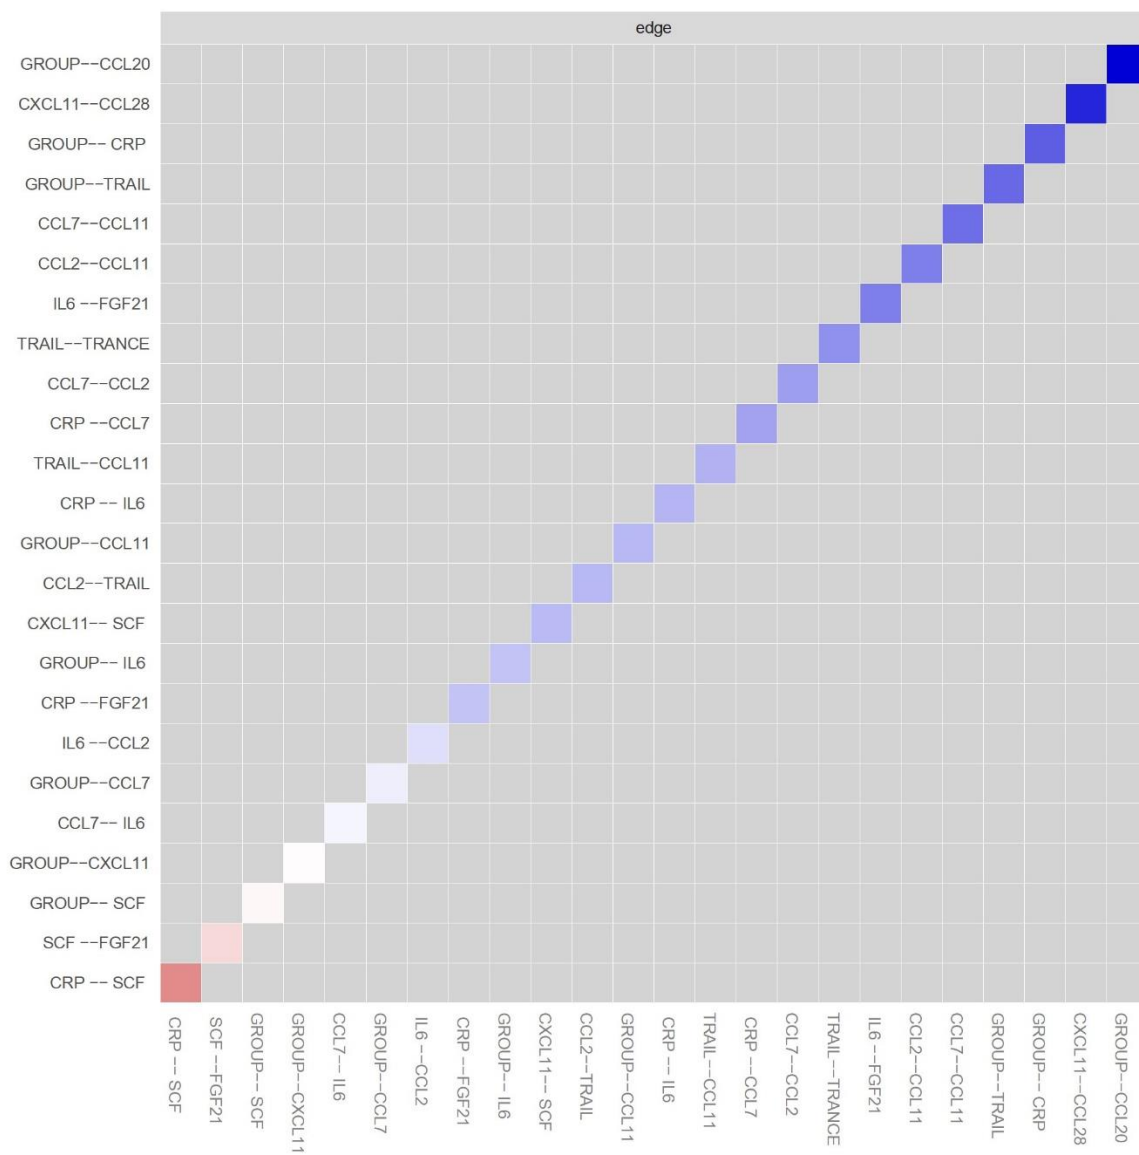

**Supplementary Figure 5**

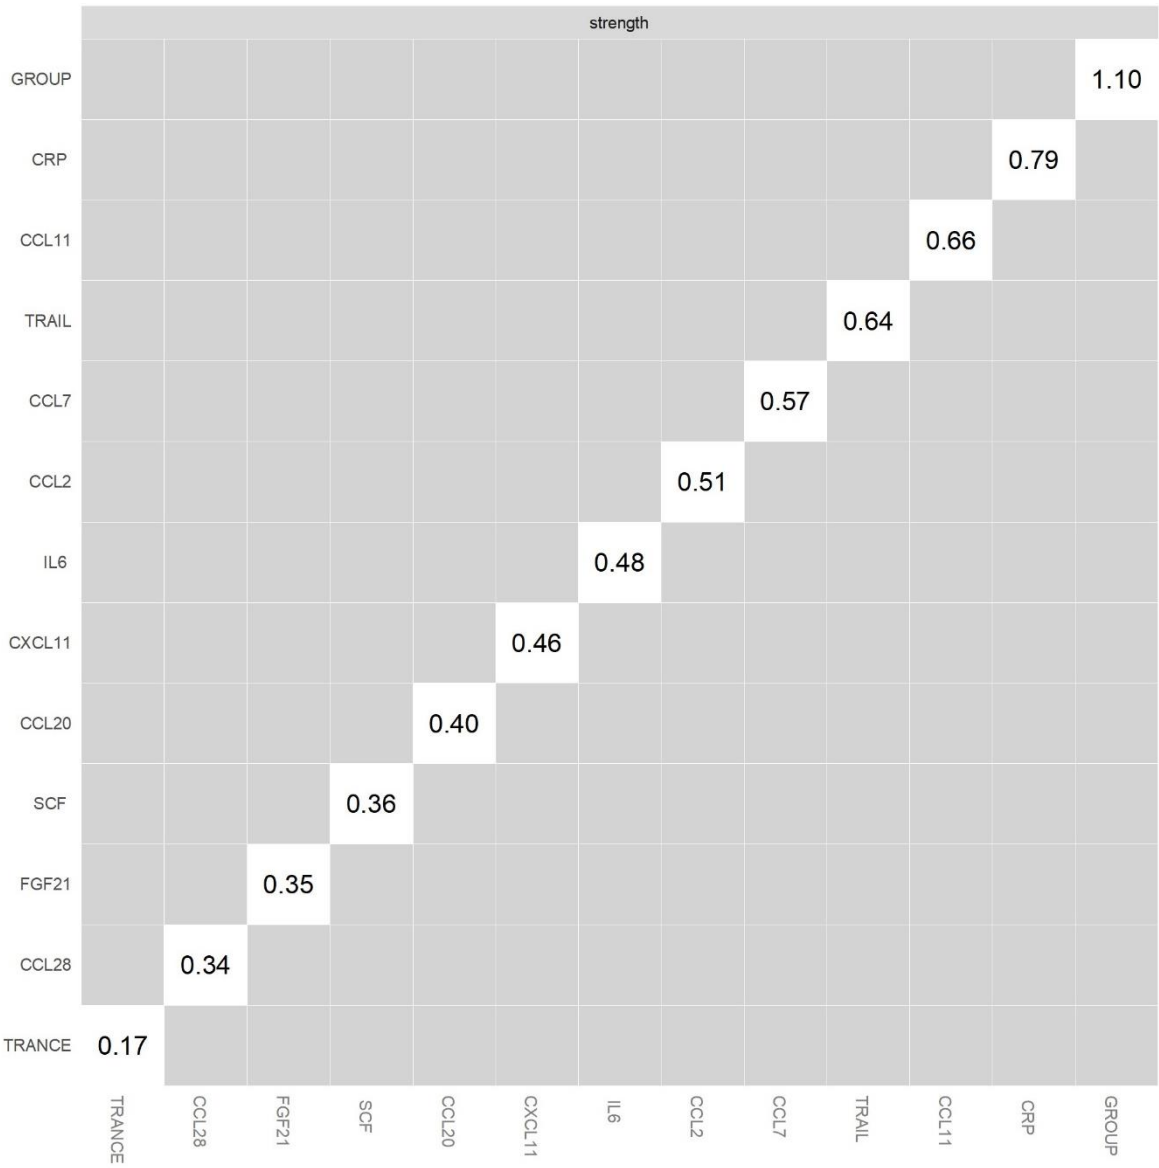

Supplementary Figure 6

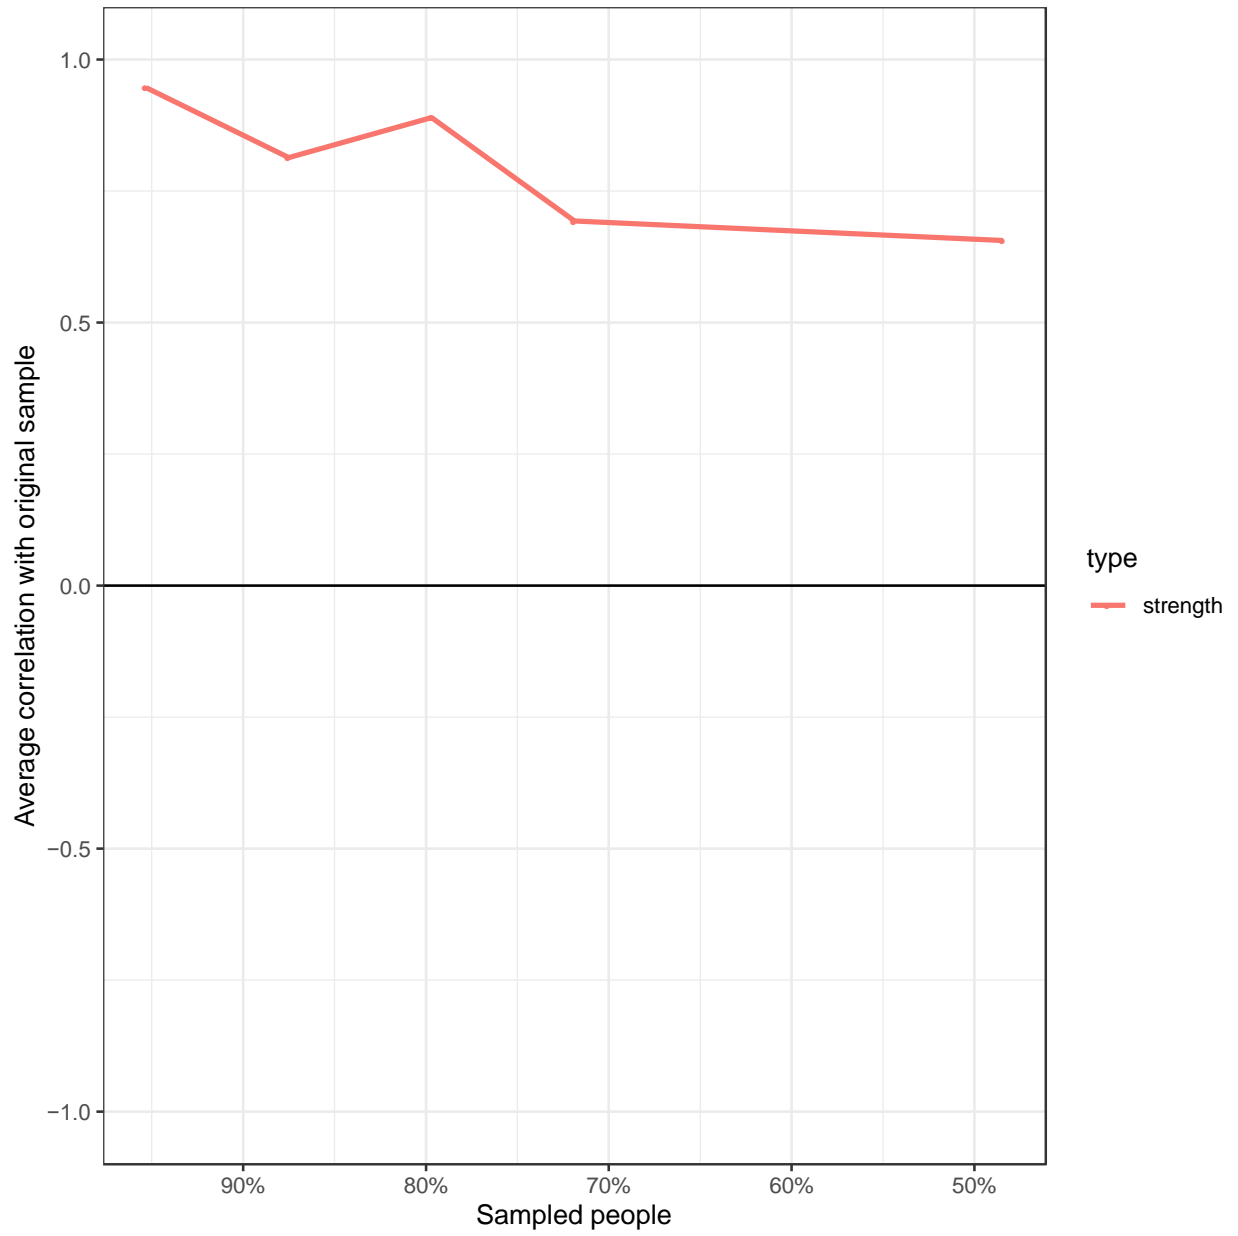



# Supplementary Figure 7

• Bootstrap mean • Sample

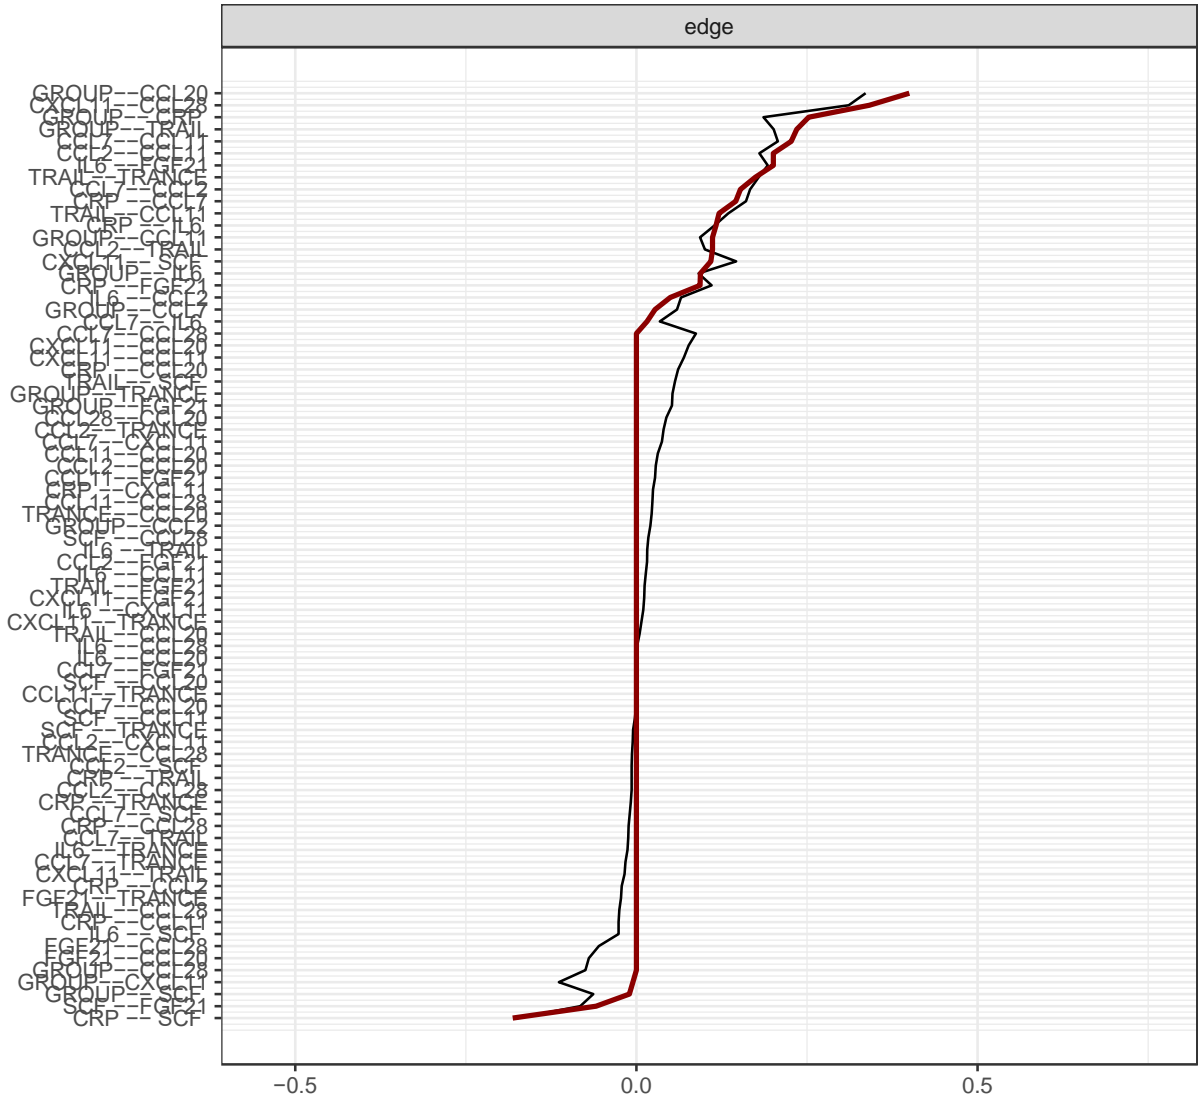

## Supplementary Tables

### Correlations between task-parameters and psychopathology, composite cognitive score and chlorpromazine equivalents in patients with SZ

| <b>Supplementary Table 1</b> | PANSS negative factor           | PANSS positive factor           | PANSS disorganized factor                                    | PANSS depressive factor         | Composite cognitive score       | Chlorpromazine equivalents      |
|------------------------------|---------------------------------|---------------------------------|--------------------------------------------------------------|---------------------------------|---------------------------------|---------------------------------|
| Total Points earned          | $r(s) = -0.07$ ,<br>$p = 0.678$ | $r(s) = -0.09$ ,<br>$p = 0.582$ | $r(s) = -0.30$ ,<br>$p = 0.055$                              | $r(s) = 0.23$ ,<br>$p = 0.141$  | $r(s) = 0.07$ ,<br>$p = 0.654$  | $r(s) = -0.21$ ,<br>$p = 0.172$ |
| Exploitation                 | $r(s) = -0.09$ ,<br>$p = 0.558$ | $r(s) = 0.15$ ,<br>$p = 0.328$  | <b><math>r(s) = -0.36</math>,<br/><math>p = 0.018</math></b> | $r(s) = 0.105$ ,<br>$p = 0.501$ | $r(s) = 0.16$ ,<br>$p = 0.303$  | $r(s) = -0.22$ ,<br>$p = 0.159$ |
| Random exploration           | $r(s) = 0.14$ ,<br>$p = 0.375$  | $r(s) = -0.17$ ,<br>$p = 0.291$ | <b><math>r(s) = 0.31</math>,<br/><math>p = 0.045</math></b>  | $r(s) = -0.07$ ,<br>$p = 0.644$ | $r(s) = -0.18$ ,<br>$p = 0.454$ | $r(s) = 0.23$ ,<br>$p = 0.132$  |
| Directed exploration         | $r(s) = -0.01$ ,<br>$p = 0.967$ | $r(s) = -0.28$ ,<br>$p = 0.074$ | $r(s) = 0.27$ ,<br>$p = 0.078$                               | $r(s) = -0.15$ ,<br>$p = 0.337$ | $r(s) = 0.01$ ,<br>$p = 0.935$  | $r(s) = 0.15$ ,<br>$p = 0.338$  |

## List of abbreviations of inflammatory parameters

| <b>Supplementary Table 2</b> |                                                               |
|------------------------------|---------------------------------------------------------------|
| <b>Abbreviation</b>          | <b>Legend</b>                                                 |
| ADA                          | Adenosine Deaminase                                           |
| AXIN1                        | Axin-1                                                        |
| Beta-NGF                     | Beta-nerve growth factor                                      |
| CASP-8                       | Caspase-8                                                     |
| CCL                          | C-C motif chemokine                                           |
| CD                           | Cluster of differentiation                                    |
| CDCP1                        | CUB domain-containing protein 1                               |
| hsCRP                        | High sensitive C-reactive protein                             |
| CSF-1                        | Colony-stimulating factor 1                                   |
| CST5                         | Cystatin-D                                                    |
| CXCL                         | C-X-C motif chemokine                                         |
| DNER                         | Delta and notch-like epidermal growth factor-related receptor |
| EN-RAGE                      | Protein S100-A12                                              |
| Flt3L                        | Fms-related tyrosine kinase 3 ligand                          |
| FGF                          | Fibroblast growth factor                                      |
| GDNF                         | Glial cell line-derived neurotrophic factor                   |
| HGF                          | Hepatocyte growth factor                                      |
| IL                           | Interleukin                                                   |
| IL-R                         | Interleukin receptor                                          |
| LAPTGF                       | Latency-associated peptide transforming growth factor beta-1  |
| Lif-R                        | Leukemia inhibitory factor receptor                           |
| MMP                          | Matrix metalloproteinase                                      |
| NT-3                         | Neurotrophin-3                                                |
| OPG                          | Osteoprotegerin                                               |
| OSM                          | Oncostatin-M                                                  |
| PD-L1                        | Programmed cell death 1 ligand 1                              |
| SCF                          | Stem cell factor                                              |
| SLAMF1                       | Signaling lymphocytic activation molecule family member 1     |
| SIRT2                        | SIR2-like protein 2                                           |
| ST1A1                        | Sulfotransferase 1A1                                          |
| STAMPB                       | STAM-binding protein                                          |
| TGF                          | Transforming growth factor                                    |
| TNFB                         | Tumor necrosis factor beta                                    |
| TNFRSF9                      | Tumor necrosis factor receptor superfamily member 9           |
| TNFSF14                      | Tumor necrosis factor ligand superfamily member 14            |
| TRANCE                       | Tumor necrosis factor-related activation-induced cytokine     |
| TWEAK                        | Tumor necrosis factor (ligand) superfamily, member 12         |
| TRAIL                        | Tumor necrosis factor related apoptosis-inducing ligand       |
| uPA                          | Urokinase-type plasminogen activator                          |
| VEGFA                        | Vascular endothelial growth factor                            |

| Supplementary Table 3 | HC (n = 19)  | SZ (n = 45)  | Test statistics      |           |
|-----------------------|--------------|--------------|----------------------|-----------|
|                       |              |              | (t'/U <sup>2</sup> ) | p         |
| ADA                   | 3.96 (0.61)  | 3.75 (0.62)  | U = 272.5            | p = 0.157 |
| AXIN1                 | 5.13 (2.07)  | 5.09 (1.40)  | U = 348.0            | p = 0.880 |
| Beta-NGF              | 1.54 (0.24)  | 1.44 (0.17)  | t = 1.899            | p = 0.063 |
| CASP-8                | 1.95 (1.26)  | 1.55 (0.87)  | U = 324.5            | p = 0.586 |
| CCL2                  | 9.54 (0.37)  | 9.78 (0.43)  | t = -2.046           | p = 0.045 |
| CCL3                  | 4.20 (0.50)  | 4.35 (0.56)  | U = 288.0            | p = 0.248 |
| CCL4                  | 6.12 (0.48)  | 6.18 (0.65)  | t = -0.317           | p = 0.753 |
| CCL7                  | 0.82 (0.37)  | 1.15 (0.53)  | t = -2.234           | p = 0.030 |
| CCL8                  | 7.89 (0.59)  | 7.62 (0.74)  | U = 265.5            | p = 0.126 |
| CCL11                 | 7.16 (0.38)  | 7.52 (0.48)  | t = -2.741           | p = 0.008 |
| CCL13                 | 3.49 (0.74)  | 3.40 (0.76)  | U = 327.0            | p = 0.616 |
| CCL19                 | 8.63 (1.09)  | 8.58 (0.62)  | U = 334.5            | p = 0.706 |
| CCL20                 | 4.55 (0.57)  | 5.55 (1.26)  | U = 158.5            | p < 0.001 |
| CCL23                 | 9.63 (0.39)  | 9.49 (0.48)  | t = 1.085            | p = 0.282 |
| CCL25                 | 5.74 (0.65)  | 5.96 (0.55)  | t = -1.320           | p = 0.192 |
| CCL28                 | 1.10 (0.43)  | 0.89 (0.47)  | U = 183.5            | p = 0.003 |
| CD5                   | 4.77 (0.27)  | 4.75 (0.42)  | U = 326.0            | p = 0.604 |
| CD6                   | 4.45 (0.45)  | 4.19 (0.50)  | t = 1.837            | p = 0.071 |
| CD40                  | 10.14 (0.68) | 9.91 (0.62)  | U = 281.5            | p = 0.206 |
| CD244                 | 6.06 (0.63)  | 5.84 (0.56)  | U = 271.0            | p = 0.150 |
| CDPC1                 | 2.21 (0.51)  | 2.45 (0.53)  | U = 259.5            | p = 0.103 |
| hsCRP                 | 0.89 (0.63)  | 2.18 (1.80)  | U = 243.5            | p = 0.007 |
| CSF-1                 | 7.78 (0.25)  | 7.76 (0.23)  | t = 0.232            | p = 0.818 |
| CST5                  | 5.82 (0.49)  | 5.70 (0.57)  | U = 297.5            | p = 0.319 |
| CXCL1                 | 8.77 (1.02)  | 8.59 (0.92)  | t = 0.648            | p = 0.520 |
| CXCL5                 | 11.28 (1.47) | 10.96 (1.16) | U = 335.0            | p = 0.713 |
| CXCL6                 | 8.19 (1.27)  | 7.85 (1.06)  | U = 309.5            | p = 0.427 |
| CXCL9                 | 6.82 (1.05)  | 6.63 (0.54)  | U = 350.0            | p = 0.907 |
| CXCL10                | 7.75 (1.04)  | 7.42 (0.75)  | U = 287.5            | p = 0.245 |
| CXCL11                | 7.85 (1.03)  | 7.23 (1.15)  | U = 223.0            | p = 0.026 |
| CX3CL1                | 4.92 (0.35)  | 4.81 (0.35)  | t = 1.078            | p = 0.286 |
| DNER                  | 7.94 (0.24)  | 7.99 (0.29)  | t = -0.532           | p = 0.597 |
| EN-RAGE               | 1.64 (0.87)  | 1.76 (0.75)  | U = 325.5            | p = 0.598 |
| Flt3L                 | 8.48 (0.52)  | 8.54 (0.54)  | t = -0.405           | p = 0.687 |
| FGF-5                 | 1.00 (0.20)  | 0.93 (0.20)  | t = 1.225            | p = 0.226 |
| FGF-19                | 7.95 (0.93)  | 7.67 (0.83)  | t = 1.133            | p = 0.262 |
| FGF-21                | 4.56 (1.35)  | 5.34 (1.20)  | t = - 2.186          | p = 0.033 |
| FGF-23                | 1.85 (0.51)  | 1.95 (0.36)  | U = 279.5            | p = 0.195 |
| GNDF                  | 1.38 (0.41)  | 1.33 (0.43)  | U = 303.5            | p = 0.371 |
| HGF                   | 7.70 (0.34)  | 7.82 (0.36)  | t = -1.203           | p = 0.234 |
| IL-6                  | 2.47 (0.51)  | 3.01 (0.91)  | t = -2.308           | p = 0.025 |
| IL-7                  | 3.91 (0.93)  | 3.62 (0.87)  | U = 295.0            | p = 0.299 |
| IL-8                  | 5.18 (0.56)  | 5.27 (0.57)  | t = -0.596           | p = 0.554 |
| IL-10                 | 2.73 (1.28)  | 2.67 (0.52)  | U = 281.5            | p = 0.206 |
| IL-10RA               | 1.44 (0.98)  | 1.36 (1.29)  | U = 285.0            | p = 0.228 |
| IL-10RB               | 6.38 (0.25)  | 6.43 (0.26)  | t = -0.673           | p = 0.504 |
| IL-12B                | 4.10 (0.66)  | 4.00 (0.78)  | t = 0.448            | p = 0.656 |
| IL-15RA               | 0.11 (0.18)  | 0.11 (0.20)  | U = 350.0            | p = 0.907 |
| IL-17C                | 1.38 (0.42)  | 1.61 (0.56)  | t = -1.547           | p = 0.127 |
| IL-18                 | 7.49 (0.47)  | 7.54 (0.47)  | t = -0.369           | p = 0.713 |
| IL-18R1               | 6.66 (0.46)  | 6.71 (0.33)  | t = -0.465           | p = 0.643 |
| K4E-BP1               | 8.69 (1.50)  | 8.55 (1.08)  | t = 0.409            | p = 0.684 |
| LAPTGF                | 7.57 (0.72)  | 7.23 (0.60)  | U = 250.0            | p = 0.073 |
| Lif-R                 | 2.30 (0.25)  | 2.29 (0.23)  | U = 347.5            | p = 0.874 |
| MMP-1                 | 11.98 (1.46) | 11.68 (1.17) | t = 0.823            | p = 0.414 |
| MMP-10                | 5.34 (0.46)  | 5.46 (0.68)  | U = 344.0            | p = 0.828 |
| NT-3                  | 1.82 (0.34)  | 1.81 (0.39)  | U = 331.0            | p = 0.663 |
| OPG                   | 10.31 (0.38) | 10.15 (0.29) | t = 1.743            | p = 0.087 |
| OSM                   | 2.31 (0.70)  | 2.47 (0.98)  | t = -0.576           | p = 0.567 |
| PD-L1                 | 3.58 (0.36)  | 3.52 (0.34)  | t = 0.576            | p = 0.567 |
| SCF                   | 9.65 (0.39)  | 9.40 (0.42)  | t = 2.125            | p = 0.038 |
| SLAMF1                | 1.27 (0.46)  | 1.15 (0.37)  | t = 1.067            | p = 0.291 |

|           |              |              |            |                                  |
|-----------|--------------|--------------|------------|----------------------------------|
| SIRT2     | 4.37 (2.11)  | 4.11 (1.47)  | U = 352.0  | $p = 0.933$                      |
| ST1A1     | 2.96 (1.35)  | 2.68 (1.00)  | U = 316.0  | $p = 0.493$                      |
| STAMPB    | 5.59 (1.80)  | 5.35 (1.25)  | U = 352.0  | $p = 0.933$                      |
| TGF-alpha | 2.34 (0.25)  | 2.38 (0.26)  | t = -0.458 | $p = 0.649$                      |
| TNF-beta  | 3.57 (0.31)  | 3.58 (0.45)  | t = -0.091 | $p = 0.928$                      |
| TNFRSF9   | 5.72 (0.40)  | 5.87 (0.40)  | t = -1.282 | $p = 0.205$                      |
| TNFSF14   | 4.53 (0.91)  | 4.43 (0.70)  | U = 349.0  | $p = 0.893$                      |
| TRAIL     | 7.94 (0.44)  | 8.31 (0.24)  | t = -4.164 | <b><math>p &lt; 0.001</math></b> |
| TRANCE    | 4.06 (0.74)  | 4.47 (0.67)  | t = -2.087 | <b><math>p = 0.041</math></b>    |
| TWEAK     | 9.33 (0.42)  | 9.20 (0.43)  | t = 1.076  | $p = 0.286$                      |
| uPA       | 10.24 (0.24) | 10.29 (0.30) | t = -0.548 | $p = 0.586$                      |
| VEGFA     | 9.31 (0.44)  | 9.33 (0.50)  | U = 335.0  | $p = 0.719$                      |

**Correlations between hsCRP, TRAIL and CCL20 with bandit task parameters in patients with SZ**

| <b>Supplementary Table 4</b> | Total points earned (Reward) | Continuously best (N) (Exploitation) | Shifts to less informative option (N) (Random Exploration) | Shifts to more informative option (N) (Directed Exploration) |
|------------------------------|------------------------------|--------------------------------------|------------------------------------------------------------|--------------------------------------------------------------|
| hsCRP                        | $r(s) = -0.19, p = 0.225$    | $r(s) = -0.27, p = 0.081$            | <b><math>r(s) = 0.40, p = 0.008</math></b>                 | $r(s) = 0.17, p = 0.284$                                     |
| TRAIL                        | $r(p) = -0.11, p = 0.517$    | $r(p) = -0.12, p = 0.445$            | $r(s) = 0.19, p = 0.248$                                   | $r(s) = 0.16, p = 0.326$                                     |
| CCL20                        | $r(s) = -0.21, p = 0.196$    | $r(s) = 0.06, p = 0.737$             | $r(s) = 0.10, p = 0.557$                                   | $r(s) = 0.13, p = 0.414$                                     |
